# Supplementary material for: Exploitation of Baird Aromaticity and Clar’s Rule for Tuning the Triplet Energies of Polycyclic Aromatic Hydrocarbons
Source: MDPI journal article supplement (doi:10.3390/chemistry3020038), 2021-04-14
Supplement: s1 [file s1]

Supporting Information  
*for*  
Exploitation of Baird aromaticity and Clar’s rule for tuning  
the triplet energies of polycyclic aromatic hydrocarbons

F. Plasser

March 26, 2021

List of Figures

|    |                                                                                                     |   |
|----|-----------------------------------------------------------------------------------------------------|---|
| S1 | Natural transition orbitals of <b>2</b> for different computational methods and geometries. . . . . | 2 |
| S2 | Natural transition orbitals of <b>3</b> for different computational methods and geometries. . . . . | 3 |
| S3 | Natural transition orbitals of <b>4</b> for different computational methods and geometries. . . . . | 4 |
| S4 | Natural transition orbitals of <b>5</b> for different computational methods and geometries. . . . . | 4 |
| S5 | Frontier orbitals of naphthalene computed at the Hartree-Fock level of theory. . . . .              | 5 |

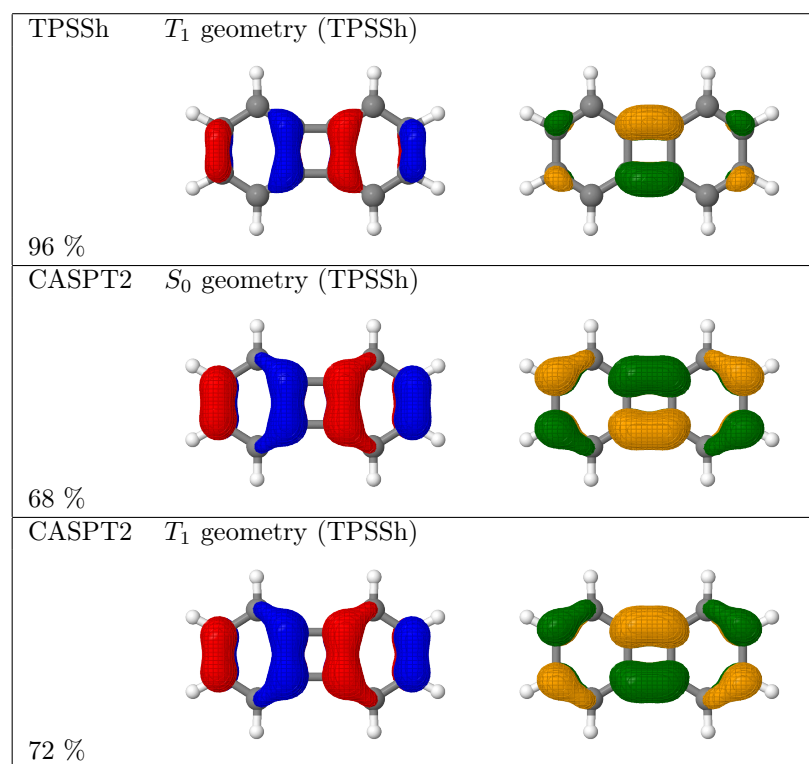

Figure S1: Natural transition orbitals of **2** for different computational methods and geometries.

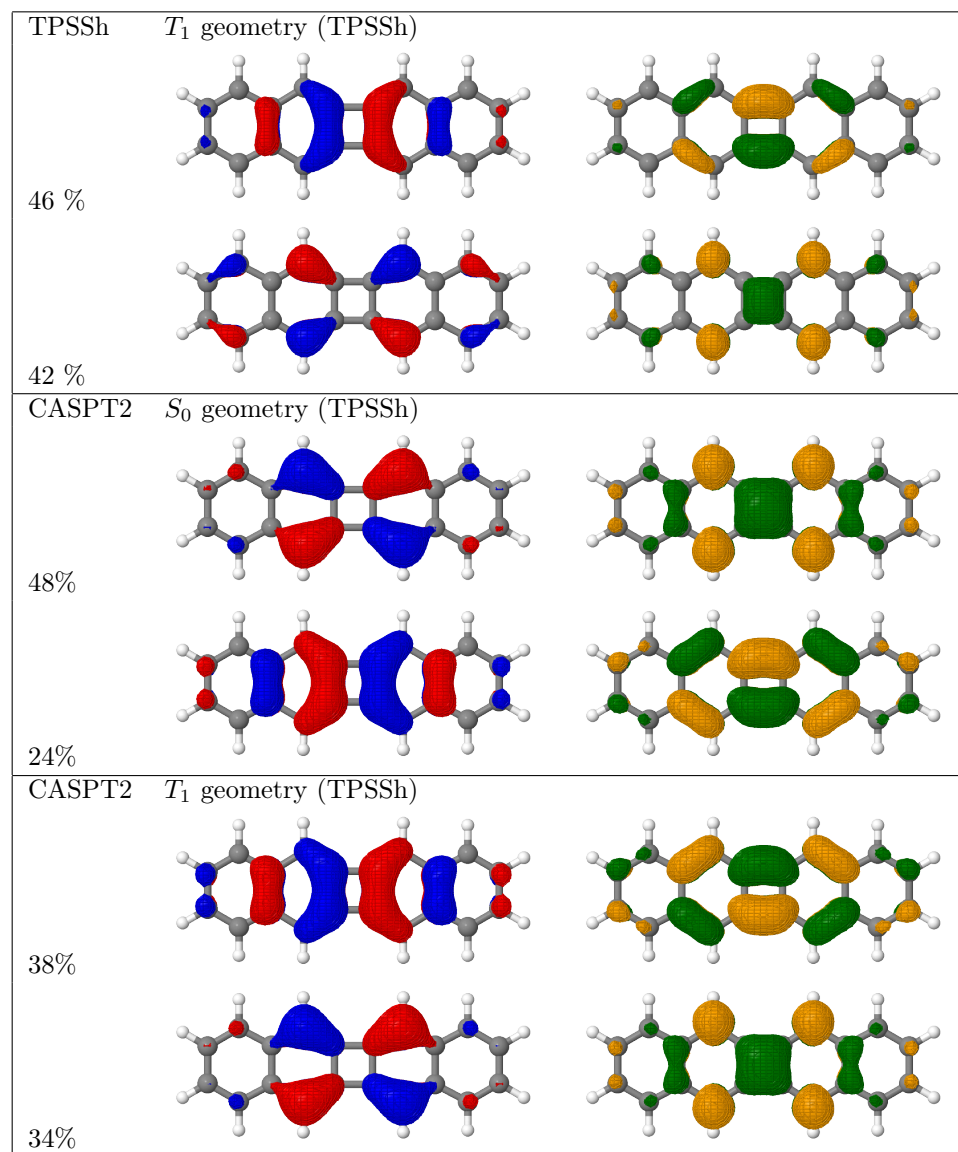

Figure S2: Natural transition orbitals of **3** for different computational methods and geometries.

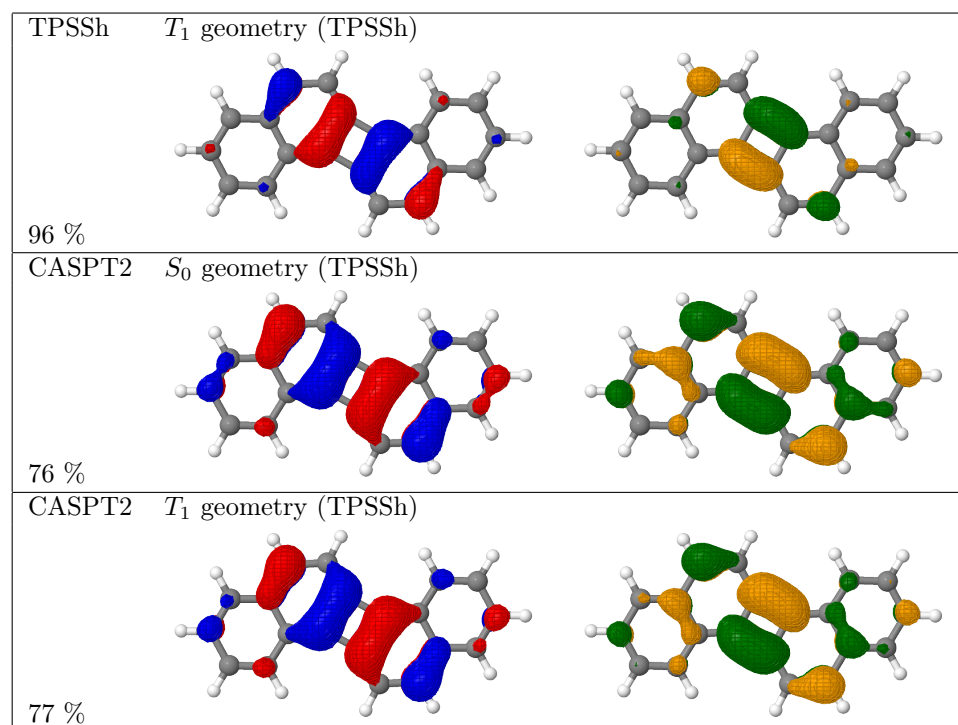

Figure S3: Natural transition orbitals of **4** for different computational methods and geometries.

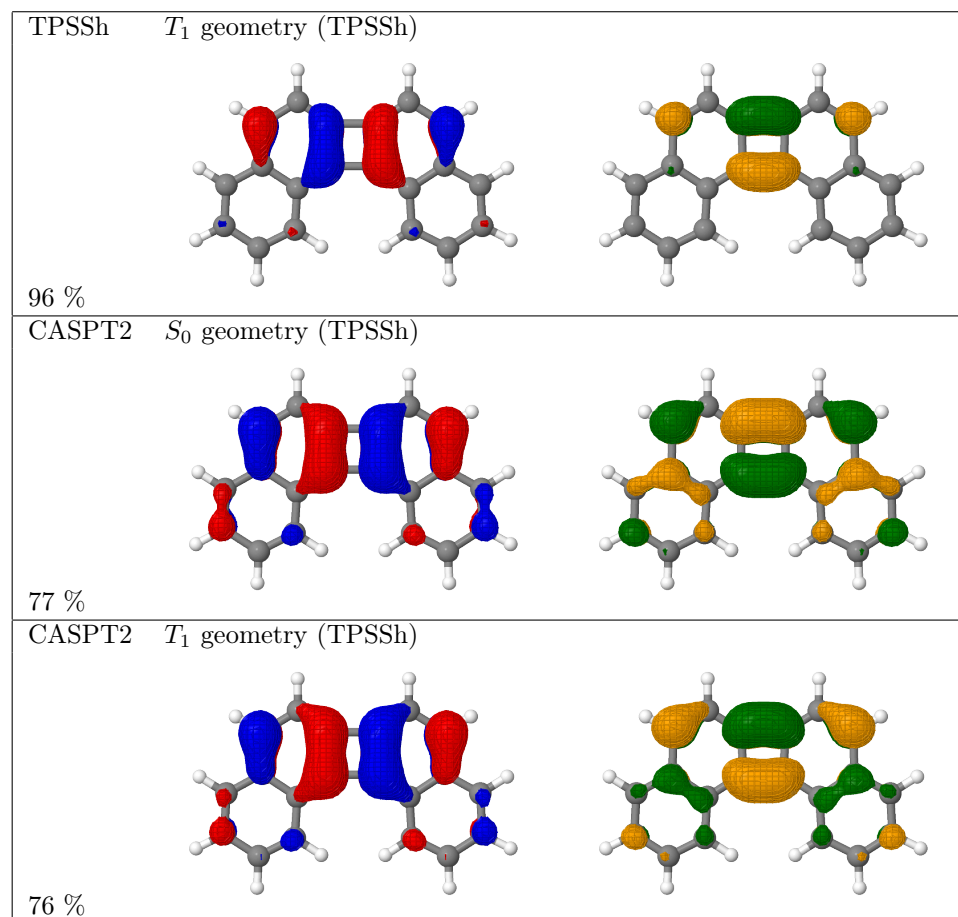

Figure S4: Natural transition orbitals of **5** for different computational methods and geometries.

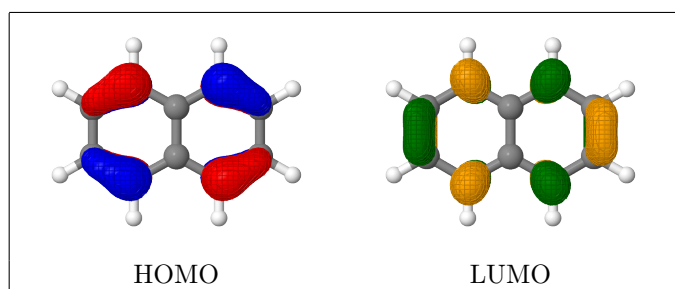

Figure S5: Frontier orbitals of naphthalene computed at the Hartree-Fock level of theory.
