# Supplementary material for: Exploitation of Baird Aromaticity and Clar’s Rule for Tuning the Triplet Energies of Polycyclic Aromatic Hydrocarbons
Source: MDPI journal article supplement (doi:10.3390/chemistry3020038), 2021-04-14
Supplement: s1 [file s1]

Archive with 1 entries (1 files):
- chemistry-1150617-supplementary.pdf
